# Supplementary material
Source: publisher site journal article supplement (http://static.cambridge.org/content/id/urn:cambridge.org:id:article:S0317167120000712/resource/name/S0317167120000712supp001.docx)
Supplement: Supplementary file 1 [file S0317167120000712supp001.docx]

**Supplemental Digital Content**

**Table 1. Methodological Quality Assessment for Case Series**

| **First Author, Publication Year** | **Selection** | **Ascertainment** | | **Causality** | | | | **Reporting** |
| --- | --- | --- | --- | --- | --- | --- | --- | --- |
| Does the patient(s) represent(s) the whole experience of the investigator (centre) or is the selection method unclear to the extent that other patients with similar presentation may not have been reported? | Was the exposure adequately ascertained? | Was the outcome adequately ascertained? | Were other alternative causes that may explain the observation ruled out? | Was there a challenge/rechallenge phenomenon? | Was there a dose–response effect? | Was follow-up long enough for outcomes to occur? | Is the case(s) described with sufficient details to allow other investigators to replicate the research or to allow practitioners make inferences related to their own practice? |
| Song, 201830 | Yes | Yes | Yes | Yes | NA | NA | Yes | Yes |
| Kaesmacher, 201931 | Yes | Yes | Yes | Yes | NA | NA | Yes | Yes |
| Manceau, 201732 | Yes | Yes | Yes | Yes | NA | NA | Yes | Yes |
| Haussen, 201633 | Yes | Yes | Yes | Yes | NA | NA | Yes | Yes |
| Li, 201734 | Yes | Yes | Yes | Yes | NA | NA | Yes | Yes |

**Table 2. Newcastle Ottawa Quality Assessment Scale**

| **First author, Publication Year** | **Selection** | | | | **Comparability** | **Outcome** | | |
| --- | --- | --- | --- | --- | --- | --- | --- | --- |
| Representativeness of the exposed cohort | Selection of the non-exposed cohort | Ascertainment of exposure | Demonstration that outcome of interest was not present at start of the study | Comparability of cohorts on the basis of the design or analysis | Assessment of outcome | Was follow-up long enough for outcomes to occur | Adequacy of follow up of cohorts |
| Kakita, 201926 | * | * | * | * | * | * | * |  |
| Jiang, 201927 | * | * | * | * | ** | * | * |  |
| Mourand, 201828 | * | * | * | * | * | * | * | * |
| Broocks , 201929 | * | * | * | * | * | * | * |  |
